# Supplementary material
Source: PubMed Central journal article supplement (PMC3190991)

## Supplementary Figure Legends

**Figure S1. Activation of RhoB and RhoC by ARHGEF10  $\Delta$ N in HEK293T cells.** *A.* HEK293T cells were transiently co-transfected with the plasmids encoding GFP-tagged ARHGEF10 wt or  $\Delta$ N, and HA-tagged RhoB. After 48 h, cells were lysed with lysis buffer. The supernatants were mixed with GST-fused Rhotekin-RBD, and active form of RhoB (RhoB-GTP) was pulled-down. The amounts of active form of RhoB were determined by immunoblotting with anti-HA antibody. Expressions of HA-RhoB and GFP-ARHGEF10 in cell lysates were also detected by immunoblotting with anti-HA and anti-GFP antibodies, respectively. The representative image of three independent experiments is shown. *B.* HEK293T cells were transiently co-transfected with the plasmids encoding GFP-ARHGEF10 wt or  $\Delta$ N, and HA-RhoC. After 48 h, cells were lysed with lysis buffer. The supernatants were mixed with GST-fused Rhotekin-RBD, and active form of RhoC (RhoC-GTP) was pulled-down. The amounts of active form of RhoC were determined by immunoblotting with anti-HA antibody. Expressions of HA-RhoC and GFP-ARHGEF10 in cell lysates were also detected by immunoblotting with anti-HA and anti-GFP antibodies, respectively. The representative image of three independent experiments is shown.

**Figure S2. Activation of RhoA and cell contraction by ARHGEF10 in HeLa cells.** *A.* Quantitative analyses of cell contraction of HeLa cells. HeLa cells were transiently transfected with the plasmid encoding GFP-ARHGEF10 wt, T332I, T332I  $\Delta$ DH, T332I/S407A, or T332I/L547A. The proportion of cell contraction was scored as a percentage of the rounded cells of GFP positive cells. Cells floating in the culture medium were excluded from counting. The data represent the mean  $\pm$  S.E. from three independent experiments.  $*p < 0.05$ . For each experiment,  $>100$  cells were counted. *B.* HeLa cells were transiently transfected with the plasmid encoding GFP-ARHGEF10 wt, T332I, T332I  $\Delta$ DH, T332I/S407A, or T332I/L547A. After 24 h, fluorescence images of living cells were observed. Rounded cells were indicated by arrowheads. *Scale bar*, 10  $\mu$ m. *C.* HeLa cells were transiently transfected with the plasmid encoding GFP-ARHGEF10 wt or T332I. After 24 h, cells were fixed and co-stained with TRITC-phalloidin (red) and Hoechst33258 (blue). Transfected cells were shown by the fluorescence of GFP (green). *Scale bar*, 10  $\mu$ m. *D.* HeLa cells were transiently co-transfected with the plasmid encoding GFP-ARHGEF10 wt, T332I, T332I  $\Delta$ DH, T332I/S407A, or T332I/L547A, pSRE.L-luciferase reporter plasmid encoding firefly luciferase, and pRL-TK control vector encoding *Renilla* luciferase. The firefly luciferase activities were normalized to the *Renilla* luciferase activities, and values are expressed as fold induction compared with wt. The data are the mean  $\pm$  S.E. from three independent experiments.  $*p < 0.05$ .

**Figure S3. Inhibition of ARHGEF10 T332I-induced cell contraction by a ROCK inhibitor in HeLa cells.** *A.* HeLa cells were transiently transfected with the plasmid encoding GFP-ARHGEF10 T332I, and cells were treated with or without 10  $\mu$ M Y27632 for 8 h. After then, fluorescence images of living cells were observed. Rounded cells were indicated by arrowheads. Cells floating in the culture medium were excluded from counting (arrows). *Scale bar*, 10  $\mu$ m. *B.* a quantitative analysis of cell contraction of HeLa cells. HeLa cells were transiently transfected with the plasmid encoding GFP-ARHGEF10 T332I, and cells were treated with or without 10  $\mu$ M Y27632 for 8 h. The proportion of cell contraction was scored as a percentage of the rounded cells of GFP positive cells. Cells floating in the culture medium were excluded from counting. The data represent the mean  $\pm$  S.E. from three independent experiments.  $*p < 0.05$ . For each experiment,  $>100$  cells were counted.

A

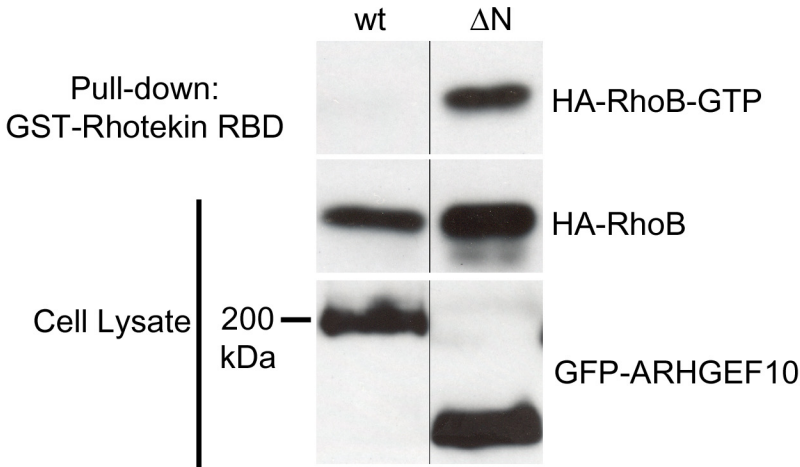

B

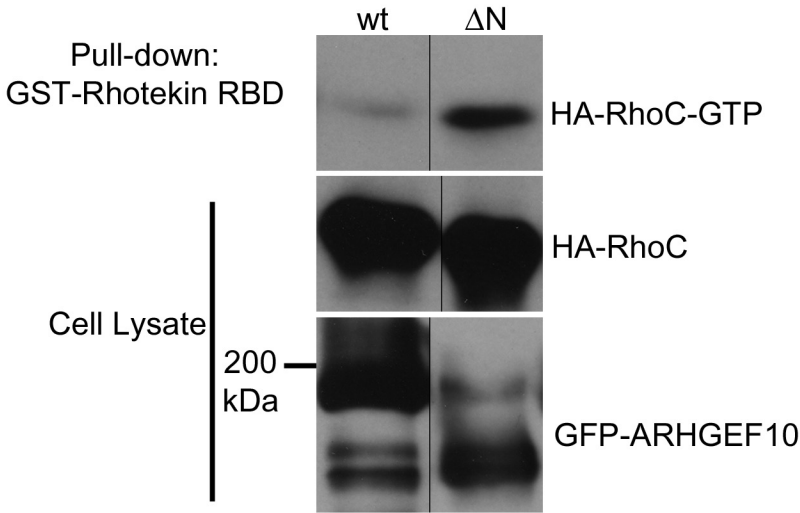

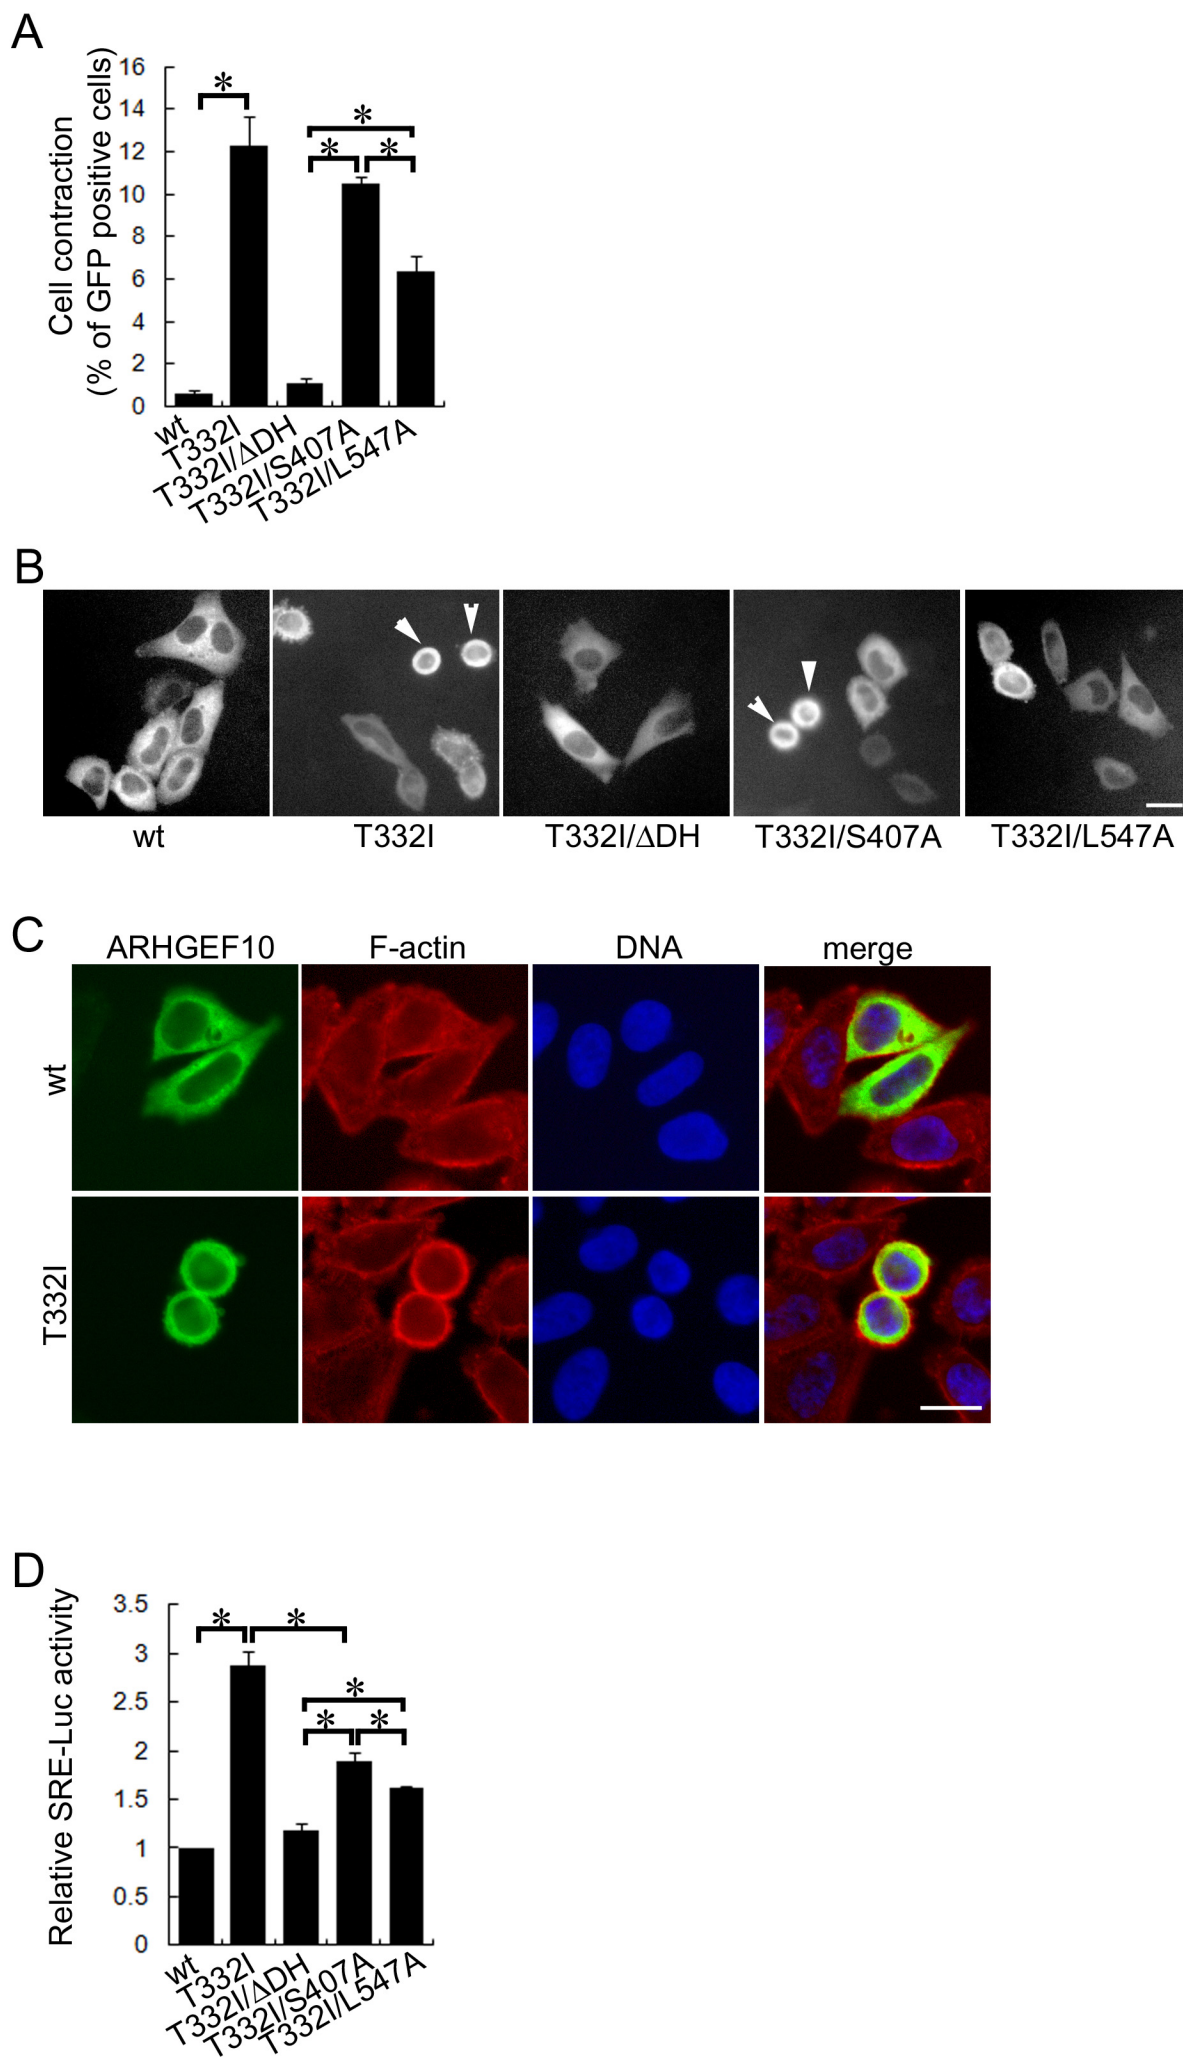

Figure S3

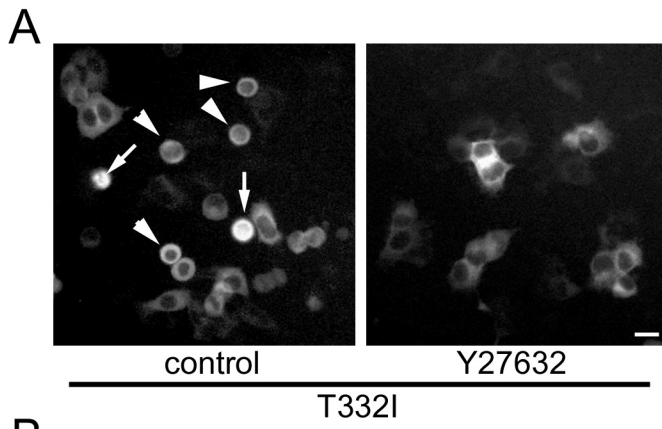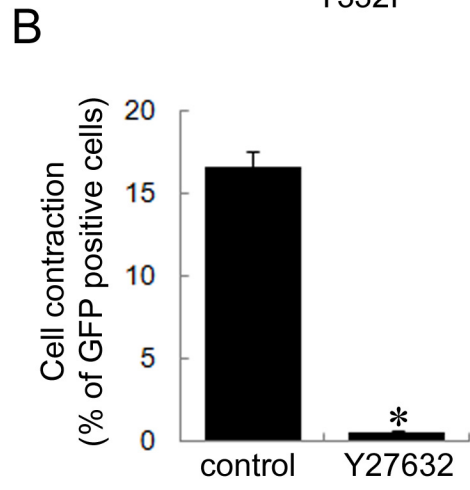

Supplement: supp_M111.236810_jbc.M111.236810-1.pdf [file supp_M111.236810_jbc.M111.236810-1.pdf]
